# Supplementary material for: Functional characterization of neuropeptides that act as ligands for both calcitonin-type and pigment-dispersing factor-type receptors in a deuterostome
Source: eLife journal article supplement (doi:10.7554/elife.101799), 2024-09-23
Supplement: fig4-data1 [file Figure 4–Source data1.xlsx]

## Sheet: Figure 4A
Figure 4-Source data
Figure 4A–SRE-driven luciferase activities in AjCTR, AjPDFR1 and AjPDFR2 expressing HEK293T cells was detected
SRE-driven luciferase activities in AjCTR expressing HEK293T cells
	CO	AjCT1	AjCT1/DMSO	AjCT1/FR900359	AjCT1/Gö6983			CO	AjCT2	AjCT2/DMSO	AjCT2/FR900359	AjCT2/Gö6983
	54	153	125	59	58			57	152	130	62	56
	54	109	111	86	81			29	127	133	74	55
	53	131	108	44	66			43	112	149	55	68
	65	137	98	89	59			29	108	113	53	60
	72	156	112	81	84			31	99	132	35	49
	79	113	115	83	76			37	104	116	47	30
	78	132	136	73	90			51	122	99	59	57
	65	133	149	86	83			57	126	128	33	40
	86	109	126	89	69			49	144	120	44	32
SRE-driven luciferase activities in AjPDFR1 expressing HEK293T cells
	CO	AjCT1	AjCT1/DMSO	AjCT1/FR900359	AjCT1/Gö6983			CO	AjCT2	AjCT2/DMSO	AjCT2/FR900359	AjCT2/Gö6983
	53	88	88	51	80			56	91	95	74	61
	48	112	96	68	76			31	79	84	61	62
	62	86	95	46	62			35	70	84	74	64
	62	78	80	57	82			80	74	70	69	62
	61	104	90	61	82			47	74	69	61	65
	61	72	85	75	58			58	104	95	74	76
	44	106	100	76	70			68	81	80	61	60
	56	108	82	58	42			85	80	71	62	51
	55	90	98	87	50			72	75	72	67	63
SRE-driven luciferase activities in AjPDFR2 expressing HEK293T cells
	CO	AjCT1	AjCT1/DMSO	AjCT1/FR900359	AjCT1/Gö6983			CO	AjCT2	AjCT2/DMSO	AjCT2/FR900359	AjCT2/Gö6983
	64	66	65	66	88			41	90	95	70	55
	54	66	65	93	82			52	86	101	50	68
	55	62	72	73	76			53	84	93	45	72
	64	69	62	56	75			50	99	89	74	61
	74	60	67	58	68			60	91	54	48	56
	77	99	99	93	68			71	142	118	75	48
	95	99	94	73	70			62	123	124	84	72
	86	74	90	90	83			65	141	115	61	54
	85	70	85	68	76			57	110	90	80	58
