# Supplementary material for: Functional characterization of neuropeptides that act as ligands for both calcitonin-type and pigment-dispersing factor-type receptors in a deuterostome
Source: eLife journal article supplement (doi:10.7554/elife.101799), 2024-09-23
Supplement: fig5-data2 [file elife-101799-fig5-data2-v1.pdf]

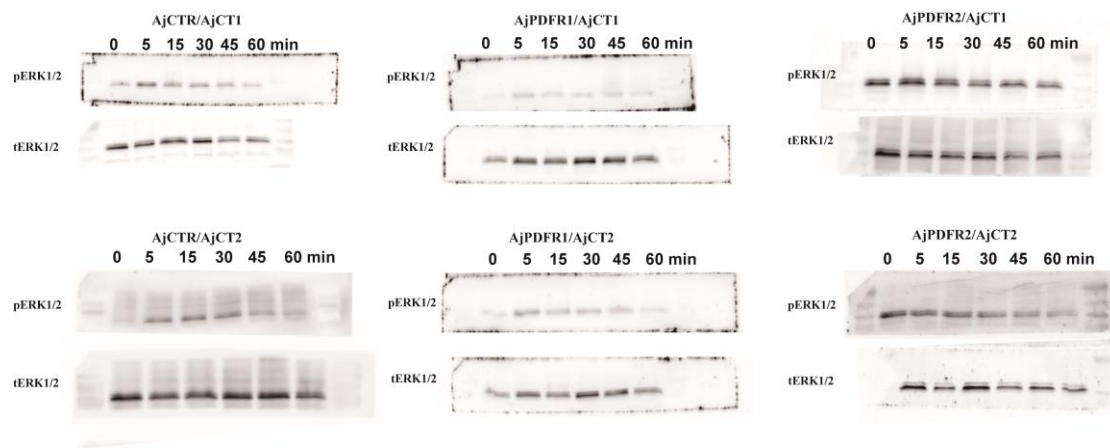

Figure 5, Source Data 2. Original membranes corresponding to Figure 5. Rainbow molecular weight markers were employed on both sides.
