# Supplementary material for: Functional characterization of neuropeptides that act as ligands for both calcitonin-type and pigment-dispersing factor-type receptors in a deuterostome
Source: eLife journal article supplement (doi:10.7554/elife.101799), 2024-09-23
Supplement: fig8-data1 [file Figure 8–Source data2.xlsx]

## Sheet: Figure8A
Figure 8--Source data
Figure 8A--Pharmacological effects of AjCT1 on longitudinal muscle from A. japonicus
Peptide concentration	Relative relaxation (%)
10-10	0.0939435
	2.22509
	1.22909
10-9	5.54993
	4.24245
	3.83451
10-8	16.8738
	11.1483
	9.13862
10-7	21.8673
	20.1869
	28.1791
10-6	26.3983
	26.2619
	37.5582

## Sheet: Figure8B
Figure 8--Source data
Figure 8B--Pharmacological effects of AjCT2 on longitudinal muscle from A. japonicus.
Peptide concentration	Relative relaxation (%)
10-10	-1.54536
	1.8783
	0.126569
	2.51558
	7.47793
10-9	-4.01304
	5.60448
	1.05151
	10.3839
	13.9091
10-8	13.1007
	36.3293
	6.32836
	25.1657
	41.2056
10-7	21.8249
	44.5877
	9.61711
	27.0493
	42.8915
10-6	18.0093
	42.5757
	12.4362
	36.4783
	53.0212

## Sheet: Figure8D
Figure 8--Source data
Figure 8D--Pharmacological effects of AjCT2 on intestine preparations from A. japonicus.
Peptide concentration	Relative relaxation (%)
10-9	-0.783794
	-1.85481
	3.30949
10-8	3.06447
	1.91655
	6.56361
10-7	3.21178
	11.7604
	13.7097
10-6	9.48855
	15.7229
	19.004
10-5	22.5117
	35.0769
	21.3975
