# Supplementary material for: Functional characterization of neuropeptides that act as ligands for both calcitonin-type and pigment-dispersing factor-type receptors in a deuterostome
Source: eLife. 2025 Nov 21;13:RP101799. doi: 10.7554/eLife.101799 (PMC12638048; doi:10.7554/eLife.101799)
Supplement: Figure 3—source data 1. [file elife-101799-fig3-data1.xlsx]

## Sheet: Figure 3A
Figure 3-Source data
Figure 3A–CRE-driven luciferase activities in AjCTR, AjPDFR1 and AjPDFR2 expressing HEK293T cells was detected
CRE-driven luciferase activities in AjCTR expressing HEK293T cells
	CO	AjCT1	AjCT1/DMSO	AjCT1/H89		CO	AjCT2	AjCT2/DMSO	AjCT2/H89
	21	68	74	43		10	53	58	22
	18	49	45	22		14	60	55	38
	16	39	50	42		13	60	53	19
	24	45	65	15		22	67	50	39
	13	61	45	37		22	70	65	23
	16	43	70	18		31	40	48	15
	22	72	43	20		23	55	62	20
	15	69	62	22		24	70	53	23
	24	68	40	18		22	60	60	35
CRE-driven luciferase activities in AjPDFR1 expressing HEK293T cells
	CO	AjCT1	AjCT1/DMSO	AjCT1/H89		CO	AjCT2	AjCT2/DMSO	AjCT2/H89
	42	52	78	41		16	42	45	45
	14	49	76	33		16	49	37	19
	17	51	63	25		17	52	35	12
	38	60	47	38		20	58	47	21
	22	44	48	23		13	50	53	31
	19	44	61	30		22	56	34	15
	20	61	52	37		25	49	43	28
	23	72	45	31		17	46	66	30
	34	60	48	33		24	45	63	19
CRE-driven luciferase activities in AjPDFR2 expressing HEK293T cells
	CO	AjCT1	AjCT1/DMSO	AjCT1/H89		CO	AjCT2	AjCT2/DMSO	AjCT2/H89
	39	64	74	42		29	77	70	39
	31	62	75	26		31	48	58	27
	28	87	69	42		28	43	60	20
	33	75	53	41		22	55	49	33
	29	82	61	36		30	40	54	45
	37	69	69	23		30	44	44	38
	34	81	71	43		31	47	57	39
	25	60	62	44		30	86	58	42
	31	68	68	32		31	50	46	23

## Sheet: Figure 3B
Figure3-Source data
Figure 3B––Quantitative detection of accumulation cAMP level in AjCTR, AjPDFR1 and AjPDFR2 expressing cells under the stimulation of AjCT1 and AjCT2 (10-9 - 10-5 M)
The concentration of AjCT1	AjCTR			pcDNA 3.1(+)				The concentration of AjCT2	AjCTR			pcDNA 3.1(+)
10-9 M	67.32	89.156	100.248	36.251	39.153	42.202		10-9 M	107.613	132.934	156.83	40.822	39.197	39.003
10-8 M	150.815	177.704	157.747	41.145	40.947	38.981		10-8 M	231.759	247.77	216.913	40.202	40.505	38.411
10-7 M	260.689	283.749	249.892	40.976	40.972	41.067		10-7 M	377.613	329.964	346.791	40.355	41.731	39.705
10-6 M	415.44	430.926	422.856	41.352	46.952	43.151		10-6 M	470.557	447.205	422.669	40.091	41.209	43.121
10-5 M	542.17	504.835	493.911	42.2052	44.7141	44.7015		10-5 M	504.17	442.884	485.671	40.723	39.83	45.739
The concentration of AjCT1	AjPDFR1			pcDNA 3.1(+)				The concentration of AjCT2	AjPDFR1			pcDNA 3.1(+)
10-9 M	19.302	16.751	18.682	1.302	1.751	0.682		10-9 M	1.667	3.258	2.182	1.667	1.258	0.182
10-8 M	19.367	18.822	22.448	1.48385	2.98199	3.1502		10-8 M	8.479	13.016	4.456	1.06894	0.391925	2.59689
10-7 M	27.181	31.082	22.181	2.11242	0.702484	2.23043		10-7 M	22.825	17.743	5.613	1.35466	1.83292	2.0441
10-6 M	72.912	60.899	53.857	3.23665	2.30497	3.57826		10-6 M	76.82	64.942	55.288	1.77081	1.59068	1.11863
10-5 M	102.614	88.791	95.174	3.34858	3.55101	3.93563		10-5 M	122.826	130.581	153.871	4.24907	2.53478	2.23043
The concentration of AjCT1	AjPDFR2			pcDNA 3.1(+)				The concentration of AjCT2	AjPDFR2			pcDNA 3.1(+)
10-9 M	5.588	3.275	3.218	2.588	1.275	1.218		10-9 M	10.568	6.684	8.071	1.568	2.684	1.071
10-8 M	10.69	6.25211	7.7222	3.81053	1.35	0.779825		10-8 M	17.967	14.358	12.614	2.31215	4.10972	2.24332
10-7 M	34.74	39.754	52.6137	3.98016	4.09352	2.06491		10-7 M	19.639	14.082	9.30391	4.24332	4.21903	2.09352
10-6 M	47.935	65.764	55.8756	2.51053	4.07733	3.34858		10-6 M	65.535	66.658	77.84	1.49433	4.52267	4.18259
10-5 M	59.031	46.402	73.0607	2.49028	4.15425	2.41741		10-5 M	92.081	111.855	103.382	2.47409	4.01255	0.478138
