# Supplementary material for: Functional characterization of neuropeptides that act as ligands for both calcitonin-type and pigment-dispersing factor-type receptors in a deuterostome
Source: eLife. 2025 Nov 21;13:RP101799. doi: 10.7554/eLife.101799 (PMC12638048; doi:10.7554/eLife.101799)
Supplement: Figure 5—figure supplement 1—source data 1. [file elife-101799-fig5-figsupp1-data1.xlsx]

## Sheet: Figure 5-figure supplement 1A
Figure 5-Source data
Figure 5-figure supplement 1A–ERK1/2 phosphorylation, activated by AjCT1 is blocked by PKC inhibitor Gö 6983 in AjCTR expressing HEK293T cells .
	CO	AjCT1/DMSO	AjCT1/H89	AjCT1/Gö6983
pERK/ERK (%)	44.7478	85.1762	70.2746	60.5558
	37.944	73.5058	107.588	54.3747
	45.6951	97.299	65.1005	56.0407
Figure 5-figure supplement 1A–ERK1/2 phosphorylation, activated by AjCT1 is blocked by PKA inhibitor H89 and PKC inhibitor in AjPDFR1 expressing HEK293T cells.
	CO	AjCT1/DMSO	AjCT1/H89	AjCT1/Gö6983
pERK/ERK (%)	25.5563	97.6436	48.1075	33.9494
	37.3925	100.901	43.9624	68.4142
	46.1665	123.178	64.0842	60.3729

## Sheet: Figure 5-figure supplement 1B
Figure 5-Source data
Figure 5-figure supplement 1B–ERK1/2 phosphorylation, activated by AjCT2, is blocked by PKC inhibitor in AjCTR expressing HEK293T cells
	CO	AjCT2/DMSO	AjCT2/H89	AjCT2/Gö6983
pERK/ERK (%)	44.5588	101.18	99.323	27.9932
	40.2273	108.411	79.1433	38.3256
	56.9543	122.845	91.9075	50.9021
Figure 5-figure supplement 1B–ERK1/2 phosphorylation, activated by AjCT2 is blocked by PKA inhibitor and PKC inhibitor in AjPDFR1 expressing HEK293T cells
	CO	AjCT2/DMSO	AjCT2/H89	AjCT2/Gö6983
pERK/ERK (%)	27.3656	127.15	52.6244	58.3518
	36.1694	99.3862	47.8942	45.3931
	46.9406	155.229	25.0097	45.0551
Figure 5-figure supplement 1B–ERK1/2 phosphorylation, activated by AjCT2 is blocked by PKA inhibitor and PKC inhibitor in AjPDFR2 expressing HEK293T cells
	CO	AjCT2/DMSO	AjCT2/H89	AjCT2/Gö6983
pERK/ERK (%)	77.7545	125.415	93.5237	99.3297
	76.989	125.957	61.5916	73.1024
	75.4726	130.938	41.7094	63.4308
