# Supplementary material for: Functional characterization of neuropeptides that act as ligands for both calcitonin-type and pigment-dispersing factor-type receptors in a deuterostome
Source: eLife. 2025 Nov 21;13:RP101799. doi: 10.7554/eLife.101799 (PMC12638048; doi:10.7554/eLife.101799)
Supplement: Figure 5—source data 1. [file elife-101799-fig5-data1.xlsx]

## Sheet: Figure 5A
Figure 5-Source data
Figure 5A–ERK1/2 activity in cells transfected with AjCTR, AjPDFR1 or AjPDFR2 and exposed to AjCT1
ERK1/2 activity in cells transfected with AjCTR exposed to AjCT1
Incubation time (min)	0	5	15	30	45	60
pERK/ERK (%)	47	54	82	98	112	62
	50	113	94	77	37	29
	37	113	47	55	71	31
ERK1/2 activity in cells transfected with AjPDFR1 exposed to AjCT1
Incubation time (min)	0	5	15	30	45	60
pERK/ERK (%)	61	122	86	82	94	104
	76	120	90	62	69	76
	71	79	131	90	77	54
ERK1/2 activity in cells transfected with AjPDFR2 exposed to AjCT1
Incubation time (min)	0	5	15	30	45	60
pERK/ERK (%)	73	62	122	93	65	81
	62	129	55	92	60	93
	83	136	134	79	138	89

## Sheet: Figure 5B
Figure 5-Source data
Figure 5B–ERK1/2 activity in cells transfected with AjCTR, AjPDFR1 or AjPDFR2 and exposed to AjCT2
ERK1/2 activity in cells transfected with AjCTR exposed to AjCT2
Incubation time (min)	0	5	15	30	45	60
pERK/ERK (%)	53	102	108	95	47	43
	52	97	122	89	49	93
	53	112	58	45	95	48
ERK1/2 activity in cells transfected with AjPDFR1 exposed to AjCT2
Incubation time (min)	0	5	15	30	45	60
pERK/ERK (%)	44	105	131	95	72	41
	71	119	96	61	70	55
	45	112	59	90	61	71
ERK1/2 activity in cells transfected with AjPDFR2 exposed to AjCT2
Incubation time (min)	0	5	15	30	45	60
pERK/ERK (%)	56	79	107	56	80	78
	59	130	72	71	79	72
	96	127	69	97	71	68
