# Supplementary material for: Functional characterization of neuropeptides that act as ligands for both calcitonin-type and pigment-dispersing factor-type receptors in a deuterostome
Source: eLife. 2025 Nov 21;13:RP101799. doi: 10.7554/eLife.101799 (PMC12638048; doi:10.7554/eLife.101799)
Supplement: Figure 6—source data 1. [file elife-101799-fig6-data1.xlsx]

## Sheet: Figure6A 
Figure 6-Source data
Figure 6A AjCTP1/2 relative transcript expression levels in different tissues of A. japonicus
Tissues	Expression level of AjCTP1/2
Intestine	1.20083
	0.654081
	2.5488
	2.02345
	2.01578
	2.36515
Longitudinal muscle	6.7935
	0.198346
	3.9536
	2.23829
	4.73769
	7.93953
Respiratory tree	0.921472
	1.27265
	0.595905
	0.442241
	2.40621
	1.34474
Gonad	1.3043
	5.13082
	5.61238
	1.62239
	0.597245
	1.92609
Circumoral nerve system	6.97281
	6.12939
	7.36608
	13.9456
	15.0496
	19.862

## Sheet: Figure6B
Figure 6-Source data
Figure 6B AjCTR relative transcript expression levels in different tissues of A. japonicus
Tissues	Expression level of AjCTR
Intestine	2.44641
	3.87
	2.71133
	3.00841
	2.18455
Longitudinal muscle	12.1173
	14.2116
	7.04045
	5.25613
	5.05952
Respiratory tree	2.37951
	2.32517
	1.08724
	0.681759
	1.17745
Gonad	0.617281
	0.594192
	0.510152
	2.25376
	2.37128
Circumoral nerve system	8.76852
	8.79896
	6.32325
	3.9834
	6.27232

## Sheet: Figure6C
Figure 6-Source data
Figure 6C AjPDFR1 relative transcript expression levels in different tissues of A. japonicus
Tissues	Expression level of AjPDFR1
Intestine	0.853226
	1.72828
	2.46115
	1.94441
	1.79959
Longitudinal muscle	5.01993
	5.07826
	5.31843
	5.7398
	4.06334
Respiratory tree	2.95399
	2.03167
	1.56573
	5.29391
	1.59402
Gonad	0.981232
	0.596392
	1.22774
	1.63694
	0.850274
Circumoral nerve system	8.10793
	11.4267
	8.95483
	4.15352
	2.9302

## Sheet: Figure6D
Figure 6-Source data
Figure 6D AjPDFR2 relative transcript expression levels in different tissues of A. japonicus
Tissues	Expression level of AjPDFR2
Intestine	2.27363
	3.02444
	1.27456
	2.10916
	1.77974
Longitudinal muscle	4.18434
	5.97249
	8.31087
	5.84958
	3.10947
Respiratory tree	20.3459
	22.3159
	22.3804
	25.9022
	22.3675
Gonad	1.50177
	0.699793
	0.82932
	1.46578
	0.782773
Circumoral nerve system	8.35902
	7.3191
	11.0043
	3.29056
	3.20058
