# Supplementary material for: Functional characterization of neuropeptides that act as ligands for both calcitonin-type and pigment-dispersing factor-type receptors in a deuterostome
Source: eLife. 2025 Nov 21;13:RP101799. doi: 10.7554/eLife.101799 (PMC12638048; doi:10.7554/eLife.101799)
Supplement: Figure 9—figure supplement 1—source data 1. [file elife-101799-fig9-figsupp1-data1.xlsx]

## Sheet: Figure 9A–figure supplement 1
Figure 9–figure supplement 1-Source data
Figure 9A–figure supplement 1 Calculation of the remaining bait mass in different phases.
Phases	CT2H				CO				CT2L
I	11.2533	6.68667	6.42667	13.0933	8.43	16.2633	17.29	0	16.0533	9.26667	11.56	5.24667
II	16.3933	4.195	11.6467	13.42	12.305	15.135	14.27	6.82	11.2833	9.91	5.57	15.0833
III	13.3667	10.7067	13.0467	11.52	14.02	13.53	14.87	16.115	12.7133	11.93	14.5833	19.82
IV	15.82	11.1733	13.0233	13.3267	19.32	10.43	14.72	19.57	12.3467	14.97	18.8933	15.9433
V	13.465	11.8867	14.8067	11.35	16.17	14.94	18.92	16.67	15.5333	18.6433	12.63	16.335
VI	10.62	13.935	13.96	12.83	13.775	18.705	19.41	17.3	12.9133	15.715	19.175	16
Figure9A–figure supplement 1 The mass of excrement in different phases.
Phases	CT2H				CO				CT2L
I	12.7493	13.776	16.196	8.34933	17.166	14.866	14.186	16.0227	11.5827	17.3793	16.5127	10.326
II	7.03267	17.106	14.036	7.596	15.3927	14.8593	15.256	10.776	12.636	18.5993	14.8427	6.89933
III	11.4293	13.721	12.836	16.196	6.13933	21.6327	15.086	9.66933	9.56933	13.0527	13.496	3.906
IV	6.496	10.326	11.6993	7.416	4.37267	15.1793	11.5927	13.6793	5.986	7.576	6.876	4.09933
V	6.346	9.12267	11.8693	11.2693	3.011	14.3893	8.866	5.351	6.766	5.87267	6.70933	4.191
VI	6.84267	10.776	10.27	7.33	6.356	8.18933	10.471	8.52	8.09933	5.036	4.131	5.83
