# Supplementary material for: Functional characterization of neuropeptides that act as ligands for both calcitonin-type and pigment-dispersing factor-type receptors in a deuterostome
Source: eLife. 2025 Nov 21;13:RP101799. doi: 10.7554/eLife.101799 (PMC12638048; doi:10.7554/eLife.101799)
Supplement: Figure 9—source data 1. [file elife-101799-fig9-data1.xlsx]

## Sheet: Figure 9A
Figure9- Source Data
Figure9A- Weight gain rate (WGR) and specific growth rate (SGR) in experimental and control groups
Groups	Weight Gain Rate (%)					Groups	Specific Growth Rate (%)
CO	24.1153	14.3644	21.09			CO	0.900171	0.559247	0.79735
CT1L	3.61245	18.2257	11.4578			CT1L	0.147864	0.697606	0.451983
CT1H	17.7677	24.2188	14.3493			CT1H	0.681434	0.903641	0.558698
CT2L	10.8478	13.9901	7.72947			CT2L	0.429117	0.545589	0.310221
CT2H	31.0756	32.6923	40.7193			CT2H	1.12752	1.1786	1.42332

## Sheet: Figure 9B
Figure9- Source Data
Figure9B- The relative intestinal transcript expression levels of AjGDF-8, AjIgf and AjMegf6 in different groups after injection of AjCT1 or AjCT2 or sterilized seawater (CO) in A. japonicus
Groups	Expression level of AjGDF-8	Expression level of AjIgf	Expression level of AjMegf6
CO	1.30812	1.32685	0.942785
	1.76643	1.04283	1.48968
	0.560259	0.76693	0.588114
	0.958157	0.942022	1.20094
	0.806176	1.00035	1.00812
CT1L	0.402855	1.71773	1.40201
	0.608502	3.07659	2.26185
	0.677128	3.59793	2.17724
	0.634342	2.36553	2.48372
	0.264255	1.68432	1.49744
CT1H	0.612027	2.65063	2.2974
	0.277713	3.98294	1.82029
	0.339739	2.75522	2.20127
	0.632148	1.70981	1.65004
	0.401925	0.754626	1.26576
CT2L	0.341116	3.20539	3.16017
	0.594604	1.56428	1.95094
	0.446738	1.57881	1.93411
	0.865537	1.0672	1.38271
	0.50406	2.41245	1.26649
CT2H	0.457973	2.66752	1.15602
	0.312624	1.34459	1.63675
	0.462492	2.63384	1.93746
	0.772889	1.68627	2.30404
	0.493401	1.43114	1.54489

## Sheet: Figure 9C
Figure9- Source Data
Figure9C- The relative intestinal expression levels of AjCT1/2 receptors (AjCTR, AjPDFR1 and AjPDFR2) in CT2H and CO groups after 24 days injection experiment.
Groups	Expression level of AjCTR	Expression level of AjPDFR1	Expression level of AjPDFR2
CO	1.09493	1.00475	0.571041
	0.782321	1.19623	1.23257
	1.32256	0.638459	0.92445
	0.815543	0.989771	1.14208
	1.08235	1.31662	1.34568
CT2H	20.2655	15.0341	4.22075
	9.06831	10.6799	3.84593
	19.1929	13.9788	3.44221
	6.22252	9.00151	3.34035
	13.5871	9.53677	6.73495
