# Supplementary material for: Functional characterization of neuropeptides that act as ligands for both calcitonin-type and pigment-dispersing factor-type receptors in a deuterostome
Source: eLife. 2025 Nov 21;13:RP101799. doi: 10.7554/eLife.101799 (PMC12638048; doi:10.7554/eLife.101799)
Supplement: Figure 10—figure supplement 1—source data 1. [file elife-101799-fig10-figsupp1-data1.xlsx]

## Sheet: Figure 10–figure supplement 1
Figure 10–figure supplement 1-Source data
Figure 10–figure supplement 1-Source data- The relative expression level of AjCTP1/2 in siNC, siAjCTP1/2-1 and siAjCTP1/2-2
Groups	Expression level of AjCTP1/2
siNC	1.00116
	1.1355
	1.63392
	0.80107
	0.672062
siAjCTP1/2-1	0.290176
	0.278355
	0.513463
	0.283221
	0.335062
siAjCTP1/2-2	0.368993
	0.474123
	0.363913
	0.861546
	0.269807
