# Supplementary material for: Functional characterization of neuropeptides that act as ligands for both calcitonin-type and pigment-dispersing factor-type receptors in a deuterostome
Source: eLife. 2025 Nov 21;13:RP101799. doi: 10.7554/eLife.101799 (PMC12638048; doi:10.7554/eLife.101799)
Supplement: Figure 10—source data 1. [file elife-101799-fig10-data1.xlsx]

## Sheet: Figure 10A
Figure10- Source Data
Figure10A- The relative intestinal expression levels of AjCTR after AjCTP1/2-1 knockdown.
Groups	Expression level of AjCTR
siNC	0.987943
	0.824067
	1.0122
	1.39959
	0.867038
siAjCTP1/2-1	0.116966
	0.144252
	0.083862
	0.046231
	0.118052

## Sheet: Figure 10B
Figure10- Source Data
Figure10B- The relative intestinal expression levels of AjPDFR1 after AjCTP1/2-1 knockdown.
Groups	Expression level of AjPDFR1
siNC	0.602138
	1.33546
	1.33391
	0.921145
	1.01209
siAjCTP1/2-1	0.085813
	0.128203
	0.028769
	0.142744
	0.395203

## Sheet: Figure 10C
Figure10- Source Data
Figure10C- The relative intestinal expression levels of AjPDFR2 after AjCTP1/2-1 knockdown.
Groups	Expression level of AjPDFR2
siNC	0.744065
	1.21574
	0.815166
	1.20874
	1.12194
siAjCTP1/2-1	0.098653
	0.041646
	0.004462
	0.10902
	0.129872
