# Supplementary material for: Functional characterization of neuropeptides that act as ligands for both calcitonin-type and pigment-dispersing factor-type receptors in a deuterostome
Source: eLife. 2025 Nov 21;13:RP101799. doi: 10.7554/eLife.101799 (PMC12638048; doi:10.7554/eLife.101799)
Supplement: Figure 11—source data 1. [file elife-101799-fig11-data1.xlsx]

## Sheet: Figure 11A
Figure11- Source Data
Figure11A- Weight gain rate (WGR) and specific growth rate (SGR) in siNC and siAjCTP1/2-1 groups.
Groups	Weight Gain Rate (%)
siNC	37.04	35.82	38.5
siAjCTP1/2-1	14.84	16.62	18.25
Groups	Specific Growth Rate (%)
siNC	1.26	1.22	1.3
siAjCTP1/2-1	1.12752	1.1786	1.42332

## Sheet: Figure 11B
Figure11- Source Data
Figure11B- Calculation of the remaining bait in different phases.
Phases	siNC												siAjCTP1/2-1
I	9.1	8.1	7.7	7.5	7	4.9	4.6	8.4	5.8	9	9.9	7.2	10.4	10.5		6.2	10.7	10.2	6.6	6.3	6.8	9.4	10.4	7
II	3.7	4.6	5.9	4.3	6.5	6.2	8.3	6.3	7.1	3.9	3.7	5.3	5	10.1	8.8	6.5	6	6.2	10.4	10.5	6.3	7	9.3	8.2
III	3.6	3.6	4.9	5.9	6.2	4.6	3.8	3.5	5.3	3.6	3.2	3.3	6.5	7.4	6.6	7.6	9.7	7.7	6.9	7.5	8.8	7.4	7.1	7.8
IV	6.5	6.5	6.1	4.2	3.9	4.1	4.1	4.3	3.7	6.3	6	4.5	9.7	10.4	7.2	7	8.8	8.4	6.8	6.8	7.4	10.7	9.7	7.9
V	3.8	5.5	4.3	4.2	4.4	4.4	4.9	5.6	4.8	3.8	3.4	4	8.1	11	10.1	7.6	7.3	7.8	8.2	8.3	7.7	10.3	9.1	7.2
VI	4.9	5.5	5.5	5	5.7	5.6	3.3	3.2	5	3.9	3.5	3.4	7.7	7.9	7.2	10.9	10.5	7.5	7.5	7.5	6.8	7.4	6.4	6.5
Figure11B- Calculation of the excrement mass in different phases.
Phases	siNC												siAjCTP1/2-1
I	4	3.5	4.9	4.8	3.7	3.5	5.2	5.1	3.9	5.5	3.8	3.5	3	3.5	5.8	3.8	3.5	3.6	4.8	3.3	3.8	3.2	3.4	2.4
II	5.4	3.9	3.5	4.8	3.2	3.5	7	6.1	5	5.4	7.4	6.1	4.4	2.3	3.2	3	2.6	2.5	2.9	2.9	4.1	3.6	5.1	3.3
III	5.4	8.6	5.3	6.4	5.5	5.7	5.9	6.1	3.5	4.4	5.7	4.6	4.7	4.7	3.6	3.7	2.8	3.5	3.8	2.6	2.6	3	2.6	2.5
IV	9.3	10	6.3	4.4	5	4.6	5.5	5.3	7.5	4.7	5.8	4.5	3.8	2.7	2.5	3.9	2.5	3.4	3.1	3.8	3.2	2	2.9	2.6
V	5.9	5.4	5.6	5.7	6.8	6.7	7.9	6.7	6.3	5.6	5.7	6	2.4	2.1	3.2	2.8	2.3	2.5	2.9	4.2	3.9	3.4	3.1	3
VI	5.9	6	5.5	5.5	5	6.5	5.2	5.8	5.2	5.5	6.2	6	2.8	3.4	4.5	2.8	2.7	2.4	4.2	4.5	4.2	1.8	3	2.7

## Sheet: Figure 11C
Figure11- Source Data
Figure11C- The relative intestinal transcript expression levels of AjGDF-8, AjIgf and AjMegf6 in siNC and siAjCTP1/2-1 groups
Groups	Expression level of AjGDF-8	Expression level of AjIgf	Expression level of AjMegf6
siNC	0.936056	0.766576	2.47827
	0.763835	0.958046	0.612451
	0.810191	2.02651	1.52379
	1.26839	0.719384	0.520391
	1.361	0.934004	0.830854
siAjCTP1/2-1	2.33297	1.43213	2.47827
	3.05181	1.37062	0.612451
	0.876403	1.19872	1.52379
	2.02979	1.51204	0.520391
	1.44026	1.32853	0.830854
