# Supplementary material for: Functional characterization of neuropeptides that act as ligands for both calcitonin-type and pigment-dispersing factor-type receptors in a deuterostome
Source: eLife. 2025 Nov 21;13:RP101799. doi: 10.7554/eLife.101799 (PMC12638048; doi:10.7554/eLife.101799)
Supplement: Figure 12—source data 1. [file elife-101799-fig12-data1.xlsx]

## Sheet: Figure 12A
Figure 12–Source data
Figure 12A–The relative expression level of AjPDFR2 in siNC, siAjPDFR2-1 and siAjPDFR2-2
Groups	Expression level of AjPDFR2
siNC	1.07
	1.11
	0.64
	1.56
	0.84
siAjPDFR2-1	0.05
	0.03
	0.04
	0.09
	0.42
siAjPDFR2-2	1.08
	0.8
	0.29
	0.43
	0.69

## Sheet: Figure 12B
Figure12- Source Data
Figure12B- Weight gain rate (WGR) and specific growth rate (SGR) in siNC and siAjPDFR2-1 groups.
Groups	Weight Gain Rate (%)
siNC	29.6	24.96	25.35
siAjPDFR2-1	20.74	21.96	17.41
Groups	Specific Growth Rate (%)
siNC	1.04	0.89	0.9
siAjPDFR2-1	0.75	0.79	0.64

## Sheet: Figure 12C
Figure12- Source Data
Figure12C- Calculation of the remaining bait in different phases.
Phases	siNC												siAjPDFR2-1
I	6	6.9	5.8	5.9	6.2	6.8	5.2	5.3	6.3	6.5	5.8	5.5	6.4	6.6	5.7	5.5	6.3	5.8	5.5	6.2	6.6	5.1	6.8	6.4
II	5.6	4.8	4.9	4.8	5.4	4.2	3.4	4.8	5.6	5	4.6	4.2	5.1	5.2	5	4.7	5.6	4.9	5.7	5.1	5.2	4.7	4.9	4.8
III	2.7	3.6	3.2	3	3.4	3.6	2.9	2.3	3.7	3.6	2.4	3.8	3.4	4.1	4.6	4.2	3.3	4.1	5.2	3.9	4.1	4.1	5.2	4.3
IV	2.5	2.7	2.4	2.8	2.7	3.5	3.1	3	3	3.3	3.7	2.8	2.9	3.2	4.4	4.9	2.8	2.8	3.8	4.8	5.1	4.1	4.2	4.5
V	3.7	3	3.1	3.1	3.4	2.7	2.7	2.8	2.9	2.7	2.1	2.5	3.9	4.1	4.5	4.9	4.1	4.3	3.5	4.3	4.3	4.9	3.8	4.8
VI	2.2	2.8	1.3	2.4	2.2	2.2	1.6	3.2	2.9	3.1	2.5	3.4	3.3	4.8	2.5	2.2	3.3	4.8	3.7	3.2	3.2	4.5	4.2	3.8
Figure12C- Calculation of the excrement mass in different phases.
Phases	siNC												siAjPDFR2-1
I	3	3.3	5.5	5.7	4.8	4.7	6.2	4.7	4.7	4.8	5.3	5.4	4.4	4.8	5.5	4.8	5.2	4.9	4.9	4.4	5.8	4.1	4.4	4.5
II	5.1	4.8	4.1	5.5	5.4	4.8	5.3	5	4.6	5.7	4.9	5.5	5.2	5.7	3.8	4.9	4.8	4.6	5.7	5.2	4.6	5.4	5.2	5.7
III	4.7	5.5	5.6	4.4	5.8	5.9	4.9	5.2	5.3	5.8	4.5	5	4.6	4.5	6	5.3	5.9	5.6	4.2	4.4	5.3	3.8	6.4	5.5
IV	4.5	4.2	6.6	6.7	5.8	6.5	4	3.9	4	6.4	5.4	5.4	5.3	4	6.5	5.5	4.9	5.2	3.6	5.9	5.3	5.2	4.6	4.8
V	6.1	5.8	5.7	4.1	6.3	4.7	5.6	4.7	4.2	4.8	6	5.9	4.4	5.5	3.8	6	4.6	3.6	5.6	5.8	5.2	4.5	5.4	5.3
VI	5.1	4.2	7.6	5.1	6	5.8	5.8	5.6	5.3	6.2	4.5	5.8	4.8	4.7	6.4	5.1	4.3	4.5	6.1	4.5	4.7	4.3	5.8	5.4

## Sheet: Figure 12D
Figure12- Source Data
Figure12D- The relative intestinal transcript expression levels of AjGDF-8, AjIgf and AjMegf6 in siNC and siAjPDFR2-1 groups
Groups	Expression level of AjGDF-8	Expression level of AjIgf	Expression level of AjMegf6
siNC	1.14764	1.0203	1.01373
	0.40763	0.838374	0.727658
	0.56201	0.824924	0.868341
	1.33515	1.02622	1.41552
	2.84876	1.38096	1.10292
siAjPDFR2-1	1.0355	0.484309	0.839731
	0.819983	0.812628	0.697211
	1.02479	0.544247	0.951318
	1.21728	1.03814	1.86348
	1.43263	0.499654	0.796272
