# Supplementary figures and images for: Functional characterization of neuropeptides that act as ligands for both calcitonin-type and pigment-dispersing factor-type receptors in a deuterostome
Source: eLife journal article supplement (doi:10.7554/elife.101799), 2024-09-23

**A**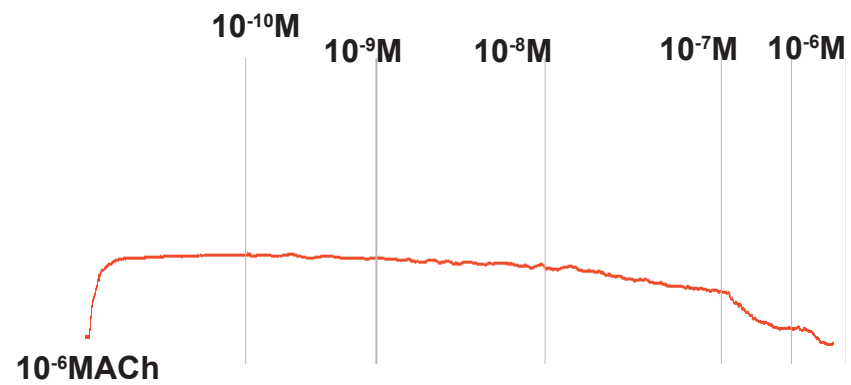**B**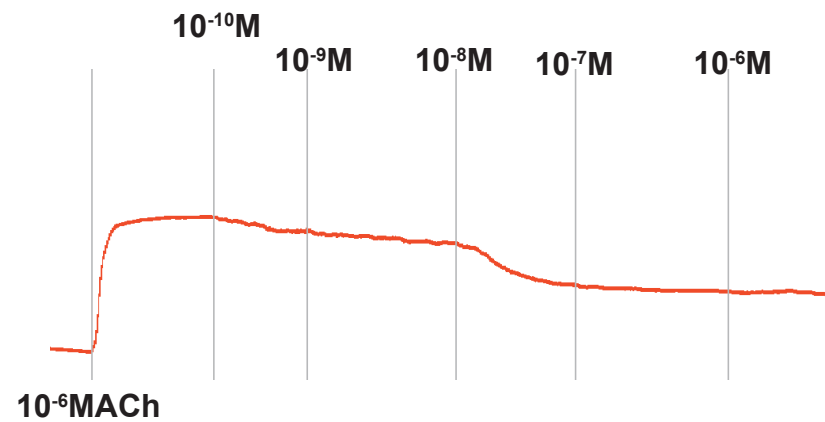**C**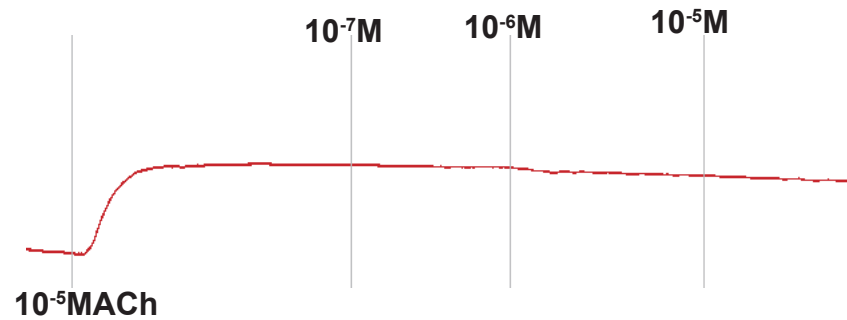**D**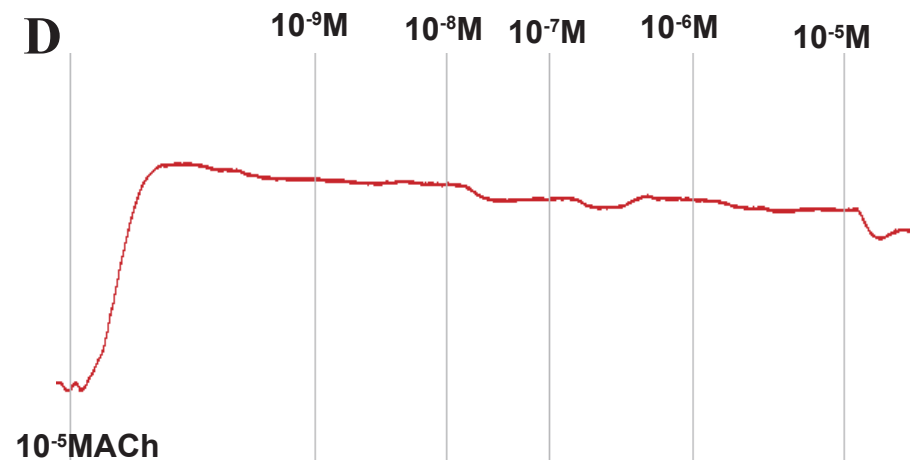

Supplement: fig8-data1 [file Figure 8-Source data1.pdf › Figure 8-Source data/Figure 8-Source data1.pdf]
